# Supplementary material for: The Transposon-Like Correia Elements Encode Numerous Strong Promoters and Provide a Potential New Mechanism for Phase Variation in the Meningococcus
Source: PLOS journal article supplement (doi:10.1371/journal.pgen.1001277), 2011-01-20
Supplement: S3 (10.1371/journal.pgen.1001277.s003) [file journal.pgen.1001277.s003]

Table S1. Plasmids used in this study

| Plasmid <sup>1</sup> | Markers <sup>2</sup> | Description                                                                                                                          | Reference or source |
|----------------------|----------------------|--------------------------------------------------------------------------------------------------------------------------------------|---------------------|
| pRC746               | Sp <sup>r</sup>      | IncQ replicon; promoterless <i>lacZ-aphA</i> operon                                                                                  | This study          |
| pRC748               | Sp <sup>r</sup>      | Consensus Correia $\alpha$ right end inserted upstream of <i>lacZ</i> in pRC746                                                      | This study          |
| pRC749               | Sp <sup>r</sup>      | Consensus Correia $\beta$ right end inserted upstream of <i>lacZ</i> in pRC746                                                       | This study          |
| pRC750               | Sp <sup>r</sup>      | Consensus Correia $\alpha^{Y128T}$ right end inserted upstream of <i>lacZ</i> in pRC746                                              | This study          |
| pRC751               | Sp <sup>r</sup>      | Consensus Correia $\beta^{Y128T}$ right end inserted upstream of <i>lacZ</i> in pRC746                                               | This study          |
| pRC759               | Sp <sup>r</sup>      | Consensus Correia $\alpha$ left end inserted upstream of <i>lacZ</i> in pRC746                                                       | This study          |
| pRC760               | Sp <sup>r</sup>      | Consensus Correia $\beta$ left end inserted upstream of <i>lacZ</i> in pRC746                                                        | This study          |
| pRC761               | Sp <sup>r</sup>      | Identical to pRC750 except for an altered (putative) -10 transcription signal sequence within the Correia $\alpha^{Y128T}$ right end | This study          |
| pRC762               | Sp <sup>r</sup>      | Identical to pRC751 except for an altered (putative) -10 transcription signal sequence within the Correia $\beta^{Y128T}$ right end  | This study          |
| pRC779               | Sp <sup>r</sup>      | Identical to pRC750 except for an altered (putative) -35 transcription signal sequence within the Correia $\alpha^{Y128T}$ right end | This study          |
| pRC781               | Sp <sup>r</sup>      | Identical to pRC751 except for an altered (putative) -35 transcription signal sequence within the Correia $\beta^{Y128T}$ right end  | This study          |
| pRS415               | Ap <sup>r</sup>      | <i>lacZYA</i> reporter plasmid for integration into the <i>E. coli</i> chromosome                                                    | Ref. 52             |
| pRC661               | Ap <sup>r</sup>      | Consensus Correia element $\alpha$ - $\alpha$ (forward orientation <sup>3</sup> ) inserted upstream of <i>lacZYA</i> in pRS415       | This study          |
| pRC662               | Ap <sup>r</sup>      | Consensus Correia element $\alpha$ - $\alpha$ (reverse orientation) inserted upstream of <i>lacZYA</i> in pRS415                     | This study          |
| pRC663               | Ap <sup>r</sup>      | Consensus Correia element $\alpha^{R52G}$ - $\alpha^{Y128T}$ (reverse orientation) inserted upstream of <i>lacZYA</i> in pRS415      | This study          |
| pRC664               | Ap <sup>r</sup>      | Consensus Correia element $\alpha^{R52G}$ - $\alpha^{Y128T}$ (forward orientation) inserted upstream of <i>lacZYA</i> in pRS415      | This study          |
| pRC665               | Ap <sup>r</sup>      | Consensus Correia element $\alpha$ - $\alpha'$ (forward orientation) inserted upstream of <i>lacZYA</i> in pRS415                    | This study          |
| pRC666               | Ap <sup>r</sup>      | Consensus Correia element $\alpha$ - $\alpha'$ (reverse orientation) inserted upstream of <i>lacZYA</i> in pRS415                    | This study          |
| pRC667               | Ap <sup>r</sup>      | Consensus Correia element $\beta$ - $\alpha$ (forward orientation) inserted upstream of <i>lacZYA</i> in pRS415                      | This study          |
| pRC668               | Ap <sup>r</sup>      | Consensus Correia element $\beta$ - $\alpha$ (reverse orientation) inserted upstream                                                 | This study          |

|        |                 | of <i>lacZYA</i> in pRS415                                                                                                    |            |
|--------|-----------------|-------------------------------------------------------------------------------------------------------------------------------|------------|
| pRC669 | Ap <sup>r</sup> | Consensus Correia element $\beta$ - $\alpha'$ (forward orientation) inserted upstream of <i>lacZYA</i> in pRS415              | This study |
| pRC670 | Ap <sup>r</sup> | Consensus Correia element $\beta$ - $\alpha'$ (reverse orientation) inserted upstream of <i>lacZYA</i> in pRS415              | This study |
| pRC671 | Ap <sup>r</sup> | Consensus Correia element $\alpha$ - $\beta$ (forward orientation) inserted upstream of <i>lacZYA</i> in pRS415               | This study |
| pRC672 | Ap <sup>r</sup> | Consensus Correia element $\alpha$ - $\beta$ (reverse orientation) inserted upstream of <i>lacZYA</i> in pRS415               | This study |
| pRC673 | Ap <sup>r</sup> | Consensus Correia element $\alpha$ - $\beta'$ (forward orientation) inserted upstream of <i>lacZYA</i> in pRS415              | This study |
| pRC674 | Ap <sup>r</sup> | Consensus Correia element $\alpha$ - $\beta'$ (reverse orientation) inserted upstream of <i>lacZYA</i> in pRS415              | This study |
| pRC675 | Ap <sup>r</sup> | Consensus Correia element $\beta$ - $\beta$ (forward orientation) inserted upstream of <i>lacZYA</i> in pRS415                | This study |
| pRC676 | Ap <sup>r</sup> | Consensus Correia element $\beta$ - $\beta$ (reverse orientation) inserted upstream of <i>lacZYA</i> in pRS415                | This study |
| pRC677 | Ap <sup>r</sup> | Consensus Correia element $\beta^{R52G}$ - $\beta^{Y128T}$ (reverse orientation) inserted upstream of <i>lacZYA</i> in pRS415 | This study |
| pRC678 | Ap <sup>r</sup> | Consensus Correia element $\beta^{R52G}$ - $\beta^{Y128T}$ (forward orientation) inserted upstream of <i>lacZYA</i> in pRS415 | This study |
| pRC679 | Ap <sup>r</sup> | Consensus Correia element $\beta$ - $\beta'$ (forward orientation) inserted upstream of <i>lacZYA</i> in pRS415               | This study |
| pRC680 | Ap <sup>r</sup> | Consensus Correia element $\beta$ - $\beta'$ (reverse orientation) inserted upstream of <i>lacZYA</i> in pRS415               | This study |

1. Plasmids were constructed as follows: pRC746, by PCR amplification of a promoterless *aphA* gene (encoding kanamycin resistance) with *EcoRI* restriction site-containing oligonucleotide primers, digestion of the PCR product with *EcoRI*, and ligation to *EcoRI*-digested pGHM491 (a kind gift from Galadriel Hovel-Miner, Columbia University, New York). pGHM491 is a broad-host range (IncQ replicon) plasmid with a promoterless *lacZ* gene. This step creates a *lacZ-aphA* operon upstream of which DNA fragments can be inserted to assess promoter activity. pRC748, pRC749, pRC750, pRC751, pRC759, pRC760, pRC761, pRC762, pRC779 and pRC781 were constructed as follows: 45/46 nucleotide complementary single-stranded oligonucleotides containing sequences of different Correia element ends (as described in Table 1 and in the text) and flanked by *PstI* and *BamHI* restriction enzyme sites were annealed to one another, digested with *PstI* and *BamHI*, and inserted into *PstI* and *BamHI* sites on pRC746. Plasmids pRC661 – pRC680 were constructed by a multi-step procedure. Full-length and prime Correia elements containing central regions identical to the consensus sequence were amplified by PCR from the genome of *N. meningitidis* Z2491 using three pairs of primers: 5'-GGCGAAGGTTTCAAGAAAGA-3' and 5'-AGAGTTTGATGTCTGGGATGG-3', 5'-CAATAGTGGTTTGCCCAACA-3' and 5'-CCGTGCATTTCTTCAAAT-3', 5'-GCTTTGGCAAACGACTGAAT-3' and 5'-GCAGTTCGGTTGAAAATCGT-3'. To generate all 10 Correia element subtypes, a second PCR was performed with various combinations of 6 primers, each containing sequences complementary to one of the three Correia element central regions amplified during the first round of PCR adjacent to sequences for the consensus Correia  $\alpha$  or  $\beta$  terminal inverted repeat. The resulting PCR products were digested with *EcoRI* (which cuts at restriction sites at the ends of each amplified DNA fragment) and ligated to *EcoRI*-digested pRS415.

2. Sp<sup>r</sup> denotes spectinomycin resistance; Ap<sup>r</sup> denotes ampicillin resistance.
3. Forward orientation refers to the left-to-right orientation of Correia element sequences presented in Figure 1A.
